# Supplementary material for: Evaluation of Antioxidant Supplementation on Redox Unbalance in Hyperthyroid Cats Treated with Methimazole: A Blinded Randomized Controlled Trial
Source: MDPI journal article supplement (doi:10.3390/antiox9010015), 2019-12-23
Supplement: s1 [file s1]

**Table S1.** Standardized questionnaire formulated *ad hoc* for the evaluation of clinical signs and symptoms of hyperthyroid cats, as reported by the owner (Owner Hyperthyroid Cat Clinical Score, OHCCS).

| OHCCS (Owner Hyperthyroid Cat Clinical Score)                                     |                                                         |                                                                                                                           |                                                                                                                    |                                                                                                                                          |                                                                                                                                                                      |                                                                                                                                                                  |
|-----------------------------------------------------------------------------------|---------------------------------------------------------|---------------------------------------------------------------------------------------------------------------------------|--------------------------------------------------------------------------------------------------------------------|------------------------------------------------------------------------------------------------------------------------------------------|----------------------------------------------------------------------------------------------------------------------------------------------------------------------|------------------------------------------------------------------------------------------------------------------------------------------------------------------|
|                                                                                   | 0                                                       | 1                                                                                                                         | 2                                                                                                                  | 3                                                                                                                                        | 4                                                                                                                                                                    | 5                                                                                                                                                                |
| <b><i>Polyphagia</i></b>                                                          | Not reported; the cat shows unmodified feeding behavior | Request of extra-food before or after feeding time                                                                        | Occasional request of extra-food during the day and before or after feeding time                                   | Frequent request of extra-food during the day and before or after feeding time                                                           | Constant request of extra-food during the day and before or after feeding time                                                                                       | Constant request of extra-food all day and night long                                                                                                            |
| <b><i>Weight loss</i></b>                                                         | Not reported                                            | Weight loss clinically undetectable but detectable on the board                                                           | Mild weight loss clinically detectable ( $\approx$ 2–3 % of BW)                                                    | Moderate weight loss clinically detectable ( $\approx$ 4–5 % of BW)                                                                      | Severe weight loss clinically detectable ( $>$ 5 % of BW)                                                                                                            | Extreme weight loss clinically detectable with muscle wasting ( $>$ 10 % of BW)                                                                                  |
| <b><i>PU/PD</i></b>                                                               | Not reported                                            | Greater in or nocturia up to 2xnormal, weekly reported                                                                    | Greater in or nocturia up to 2Xnormal, daily reported                                                              | Urine production $>$ 2Xnormal but $<$ hourly. Frequent search of water (water consumption still in the normal range)                     | $>$ 1 mL Kg <sup>-1</sup> h <sup>-1</sup> urine production $>$ 2 mL Kg <sup>-1</sup> h <sup>-1</sup> . Constant search of water (water consumption $>$ 45 mL/kg/day) | $<$ 3 mL Kg <sup>-1</sup> h <sup>-1</sup> urine production. Constant search of water (water consumption $>$ 60 mL/kg/day)                                        |
| <b><i>Vomiting/Diarrhea</i></b>                                                   | Not reported                                            | Vomiting and/or diarrhea reported one or two times monthly, self-limiting. Consultation and supportive therapy not needed | Vomiting and/or diarrhea reported one or two times weekly. Consultation needed without home therapy                | Vomiting and/or diarrhea reported $>$ 2 times weekly or on a daily base. Consultation an home therapy needed                             | Diarrhea or vomiting reported $>$ 3 times on a daily base; hospitalization and supportive care needed                                                                | Diarrhea or vomiting reported several times on a daily base; hospitalization and intensive care needed. Life-threatening condition                               |
| <b><i>Behavioral changes (aggressiveness, irritability, panic attacks...)</i></b> | Not reported; the cat shows unmodified social behavior  | Occasional signs of irritability and discomfort during social interactions, without showing an aggressive behavior        | Frequent signs of irritability and discomfort during social interactions, with few episodes of aggressive behavior | Constant signs of irritability and discomfort during social interactions, with frequent episodes of aggressive behavior                  | As score 3 + changing in social hierarchy with other pets and or altered interactions with the owner. Few episodes of vocalization during the night                  | Several episodes of aggressive behavior on a daily base; total subversion in social hierarchy, absence of interactions with owners, vocalizations all night long |
| <b><i>Anorexia</i></b>                                                            | Not reported; the cat shows unmodified feeding behavior | Oral intake always present but with signs of disorexia and capricious appetite; dietary change not needed.                | Oral intake altered (1 day duration); dietary change required to maintain appetite                                 | Oral intake altered (1–3 days duration) but no hospitalization needed. Oral nutritional supplements/appetite stimulants may be indicated | Oral intake severely altered ( $>$ 3 days duration); hospitalization and feeding tube needed.                                                                        | Oral intake severely altered ( $>$ 5 days duration); hospitalization and intensive care required. TPN indicated. Life-threatening condition                      |
| <b><i>Lethargy</i></b>                                                            | Not reported; the cat shows unmodified ADL              | Occasional or intermittent lethargy over baseline weekly reported; unmodified ADL                                         | Mild lethargy over baseline; diminished spontaneous activity not causing difficulties in performing ADL            | Moderate lethargy causing some difficulties with performing ADL; ambulatory only to point of eating, sleeping and litterbox area         | Severely restricted in ADL; unable to confine urination and defecation to litterbox area. Food consumed only if offered in place                                     | Disabled, must be force fed and helped to perform ADL                                                                                                            |

ADL: activity of daily living; BW: body weight

| OHCCS (Owner Hyperthyroid Cat Clinical Score) / Clinical chart             |        |            |               |           |          |          |                             |
|----------------------------------------------------------------------------|--------|------------|---------------|-----------|----------|----------|-----------------------------|
| CASE NUMBER/<br>PATIENT SIGNALMENT                                         | # ____ | Owner ____ | Cat name ____ | Breed____ | Age ____ | BW__     | Life-style____ Feeding ____ |
| Date:                                                                      | ET     | T1         | T2            | T3        | FT       | Comments |                             |
| <i>Polyphagia</i>                                                          |        |            |               |           |          |          |                             |
| <i>Weight loss</i>                                                         |        |            |               |           |          |          |                             |
| <i>PU/PD</i>                                                               |        |            |               |           |          |          |                             |
| <i>Vomiting/Diarrhea</i>                                                   |        |            |               |           |          |          |                             |
| <i>Behavioral changes (aggressiveness, irritability, panic attacks...)</i> |        |            |               |           |          |          |                             |
| <i>Anorexia</i>                                                            |        |            |               |           |          |          |                             |
| <i>Lethargy</i>                                                            |        |            |               |           |          |          |                             |
| OHCCS-TOTAL SCORE:                                                         |        |            |               |           |          |          |                             |

ADL: activity of daily living; BW: body weight

**Table S2.** Standardized questionnaire formulated *ad hoc* for the evaluation of clinical signs and symptoms of hyperthyroid cats, as reported by the veterinarian (Veterinarian Hyperthyroid Cat Clinical Score, VHCCS).

| VHCCS (Veterinarian Hyperthyroid Cat Clinical Score)                                                                                                                              |                                                                                |                                                                                                                           |                                                                                                     |                                                                                                            |                                                                                                    |                                                                                                                                    |
|-----------------------------------------------------------------------------------------------------------------------------------------------------------------------------------|--------------------------------------------------------------------------------|---------------------------------------------------------------------------------------------------------------------------|-----------------------------------------------------------------------------------------------------|------------------------------------------------------------------------------------------------------------|----------------------------------------------------------------------------------------------------|------------------------------------------------------------------------------------------------------------------------------------|
|                                                                                                                                                                                   | 0                                                                              | 1                                                                                                                         | 2                                                                                                   | 3                                                                                                          | 4                                                                                                  | 5                                                                                                                                  |
| <i>Modified BCS</i>                                                                                                                                                               | BCS = 7 or >, fBMI in the Over weight area                                     | BCS = 6, fBMI in the Normal area                                                                                          | BCS = 5, fBMI in the Normal area                                                                    | BCS = 4, fBMI in the Normal or Under weight area                                                           | BCS = 2 or 3, fBMI in the Underweight area                                                         | BCS = 1, severe muscle wasting, fBMI in the Underweight area                                                                       |
| <i>Coat and skin status</i>                                                                                                                                                       | Coat extremely well kempt, clean and shiny                                     | Coat well kempt, clean and shiny                                                                                          | Coat kempt enough, clean but opaque                                                                 | Coat poorly kempt, opaque but still clean                                                                  | Unkempt coat                                                                                       | Skin lesions, alopecic areas                                                                                                       |
| <i>Attitude toward clinical maneuver</i>                                                                                                                                          | Collaborative and friendly patient which can be handled with minimum restraint | Collaborative patient which need some restraint                                                                           | Tolerant patient which need restraint                                                               | Poorly tolerant patient which shows early signs of annoyance. Firm restraint needed                        | Intolerant patient which shows immediate signs of annoyance. Firm restraint needed.                | Intolerant and aggressive patient which need restraint devices to be examined                                                      |
| <i>Ocular fundic examination focused on hypertensive lesions</i><br>(Performed only when mean systolic blood pressure was > 160 mmHg and diastolic blood pressure was > 100 mmHg) | Not reported                                                                   | Vomiting and/or diarrhea reported one or two times monthly, self-limiting. Consultation and supportive therapy not needed | Vomiting and/or diarrhea reported one or two times weekly. Consultation needed without home therapy | Vomiting and/or diarrhea reported > 2 times weekly or on a daily base. Consultation an home therapy needed | Diarrhea or vomiting reported >3 times on a daily base; hospitalization and supportive care needed | Diarrhea or vomiting reported several times on a daily base; hospitalization and intensive care needed. Life-threatening condition |
| <i>Cardiac auscultation</i>                                                                                                                                                       | Normal heart rate and heart sounds                                             | Mild to severe tachycardia (<200 bpm) with normal heart sounds                                                            | Severe tachycardia and "pounding" heart sounds                                                      | Heart murmur                                                                                               | Gallop rhythm                                                                                      | Signs of cardiac heart failure                                                                                                     |
| <i>Modified semi-quantitative thyroid palpation</i>                                                                                                                               | Equivalent to score 0 according to Norsworthy et al., 2002                     | Equivalent to score 1 according to Norsworthy et al., 2002                                                                | Equivalent to score 2 according to Norsworthy et al., 2002                                          | Equivalent to score 3 according to Norsworthy et al., 2002                                                 | Equivalent to score 4 according to Norsworthy et al., 2002                                         | Equivalent to score 5 and 6 according to Norsworthy et al., 2002                                                                   |

BCS: Body condition score; fBMI = feline Body Mass Index.

| VHCCS (Veterinarian Hyperthyroid Cat Clinical Score) / Clinical chart |    |       |          |       |     |          |            |         |
|-----------------------------------------------------------------------|----|-------|----------|-------|-----|----------|------------|---------|
| CASE NUMBER/<br>PATIENT SIGNALMENT                                    | #  | Owner | Cat name | Breed | Age | BW       | Life-style | Feeding |
| Date:                                                                 | ET | T1    | T2       | T3    | FT  | Comments |            |         |
| Modified BCS                                                          |    |       |          |       |     |          |            |         |
| Coat and skin status                                                  |    |       |          |       |     |          |            |         |
| Attitude toward clinical mannouvre                                    |    |       |          |       |     |          |            |         |
| Ophtalmic examination                                                 |    |       |          |       |     |          |            |         |
| Cardiac auscultation                                                  |    |       |          |       |     |          |            |         |
| Modified semi-quantitative thyroid palpation                          |    |       |          |       |     |          |            |         |
| VHCCS-TOTAL SCORE:                                                    |    |       |          |       |     |          |            |         |

|                                    |                                                         | SEMT (Side-effects Methimazole Treatment)                                                                                 |                                                                                                         |                                                                                                                                          |                                                                                                                                  |                                                                                                                                          |   |
|------------------------------------|---------------------------------------------------------|---------------------------------------------------------------------------------------------------------------------------|---------------------------------------------------------------------------------------------------------|------------------------------------------------------------------------------------------------------------------------------------------|----------------------------------------------------------------------------------------------------------------------------------|------------------------------------------------------------------------------------------------------------------------------------------|---|
|                                    |                                                         | 0                                                                                                                         | 1                                                                                                       | 2                                                                                                                                        | 3                                                                                                                                | 4                                                                                                                                        | 5 |
| <b>Anorexia</b>                    | Not reported; the cat shows unmodified feeding behavior | Oral intake always present but with signs of disorexia and capricious appetite; dietary change not needed.                | Oral intake altered (1 day duration); dietary change required to maintain appetite                      | Oral intake altered (1–3 days duration) but no hospitalization needed. Oral nutritional supplements/appetite stimulants may be indicated | Oral intake severely altered (>3 days duration); hospitalization and feeding tube needed.                                        | Oral intake severely altered (> 5 days duration); hospitalization and intensive care required. TPN indicated. Life-threatening condition |   |
| <b>Lethargy</b>                    | Not reported; the cat shows unmodified ADL              | Occasional or intermittent lethargy over baseline weekly reported; unmodified ADL                                         | Mild lethargy over baseline; diminished spontaneous activity not causing difficulties in performing ADL | Moderate lethargy causing some difficulties with performing ADL; ambulatory only to point of eating, sleeping and litterbox area         | Severely restricted in ADL; unable to confine urination and defecation to litterbox area. Food consumed only if offered in place | Disabled, must be force fed and helped to perform ADL                                                                                    |   |
| <b>Vomiting/Diarrhea</b>           | Not reported                                            | Vomiting and/or diarrhea reported one or two times monthly, self-limiting. Consultation and supportive therapy not needed | Vomiting and/or diarrhea reported one or two times weekly. Consultation needed without home therapy     | Vomiting and/or diarrhea reported > 2 times weekly or on a daily base. Consultation and home therapy needed                              | Diarrhea or vomiting reported >3 times on a daily base; hospitalization and supportive care needed                               | Diarrhea or vomiting reported several times on a daily base; hospitalization and intensive care needed. Life-threatening condition       |   |
| <b>Facial pruritus/excoriation</b> | Not reported                                            | Occasional (reported on weekly base), not interfering with feeding and sleeping activity                                  | Intermittent (>3 episodes reported per week), not interfering with feeding and sleeping activity        | Mild but prolonged (reported on daily base), partially interfering with sleeping but not with feeding activity                           | Moderate but prolonged, partially interfering with feeding and sleeping activity                                                 | Severe and prolonged, continues when the cat is eating or sleeping. Signs of self-mutilations                                            |   |
| <b>Liver dysfunction</b>           | Non reported                                            | Light signs attributable to hepatic dysfunction                                                                           | Mild signs attributable to hepatic dysfunction + jaundice                                               | Moderate signs of acute liver failure. Hospitalization and supportive care needed.                                                       | Severe signs of acute liver failure. Hospitalization and intensive care needed. Life-threatening condition                       | Hepatic encephalopathy or coma                                                                                                           |   |

| SEMT (Side-effects Methimazole Treatment) / Chart |    |       |          |       |     |    |            |          |
|---------------------------------------------------|----|-------|----------|-------|-----|----|------------|----------|
| CASE NUMBER/<br>PATIENT SIGNALMENT                | #  | Owner | Cat name | Breed | Age | BW | Life-style | Feeding  |
| Date:                                             | ET | T1    | T2       | T3    |     | FT |            | Comments |
| Anorexia                                          |    |       |          |       |     |    |            |          |
| Lethargy                                          |    |       |          |       |     |    |            |          |
| Vomiting/Diarrhea                                 |    |       |          |       |     |    |            |          |
| Facial pruritus/excoriation                       |    |       |          |       |     |    |            |          |
| Liver dysfunction                                 |    |       |          |       |     |    |            |          |
| SEMT-TOTAL SCORE:                                 |    |       |          |       |     |    |            |          |
